# Supplementary material
Source: PubMed Central journal article supplement (PMC5286958)
Supplement: 2016_155838-Disclosures_and_Contributions.pdf [file 2016_155838-Disclosures_and_Contributions.pdf]

Haematologica  
HAEMATOL/2016/155838  
Version 3

Human RAD52: a novel player in DNA repair in cancer and  
immunodeficiency

Sujal Ghosh, Andrea Hönscheid, Gregor Dückers, Sebastian Ginzel,  
Holger Gohlke, Michael Gombert, Bettina Kempkes, Wolfram Klapper,  
Michaela Kuhlen, Hans-Jürgen Laws, Rene' Martin Linka, Roland  
Meisel, Christian Mielke, Tim Niehues, Detlev Schindler, Dominik  
Schneider, Friedhelm R. Schuster, Carsten Speckmann, and Arndt  
Borkhardt

Disclosures: None

Contributions: Su.G. and A.B. performed immunological and clinical work-up, took clinical supervision, designed and planned experiments, gathered and analyzed data and wrote the manuscript. A.H. designed, planned and performed experiments and analyzed data. G.D., M.K., H.J.L., R.M., T.N., Do.S., F.S., C.S., performed and gathered immunological and clinical work-up, took clinical supervision and advised for experimental work-up. Se.G, H.G., M.G., B.K., W.K., R.M.L., C.M., De.S. designed and performed experiments.
